# Supplementary material
Source: PubMed Central journal article supplement (PMC7543359)
Supplement: ONCO-25-e1541-s001.pdf [file ONCO-25-e1541-s001.pdf]

Supplemental Figure for:  
Early and Late Recurrence of Hepatitis B Virus-associated Hepatocellular Carcinoma  
Tian Yang et al.

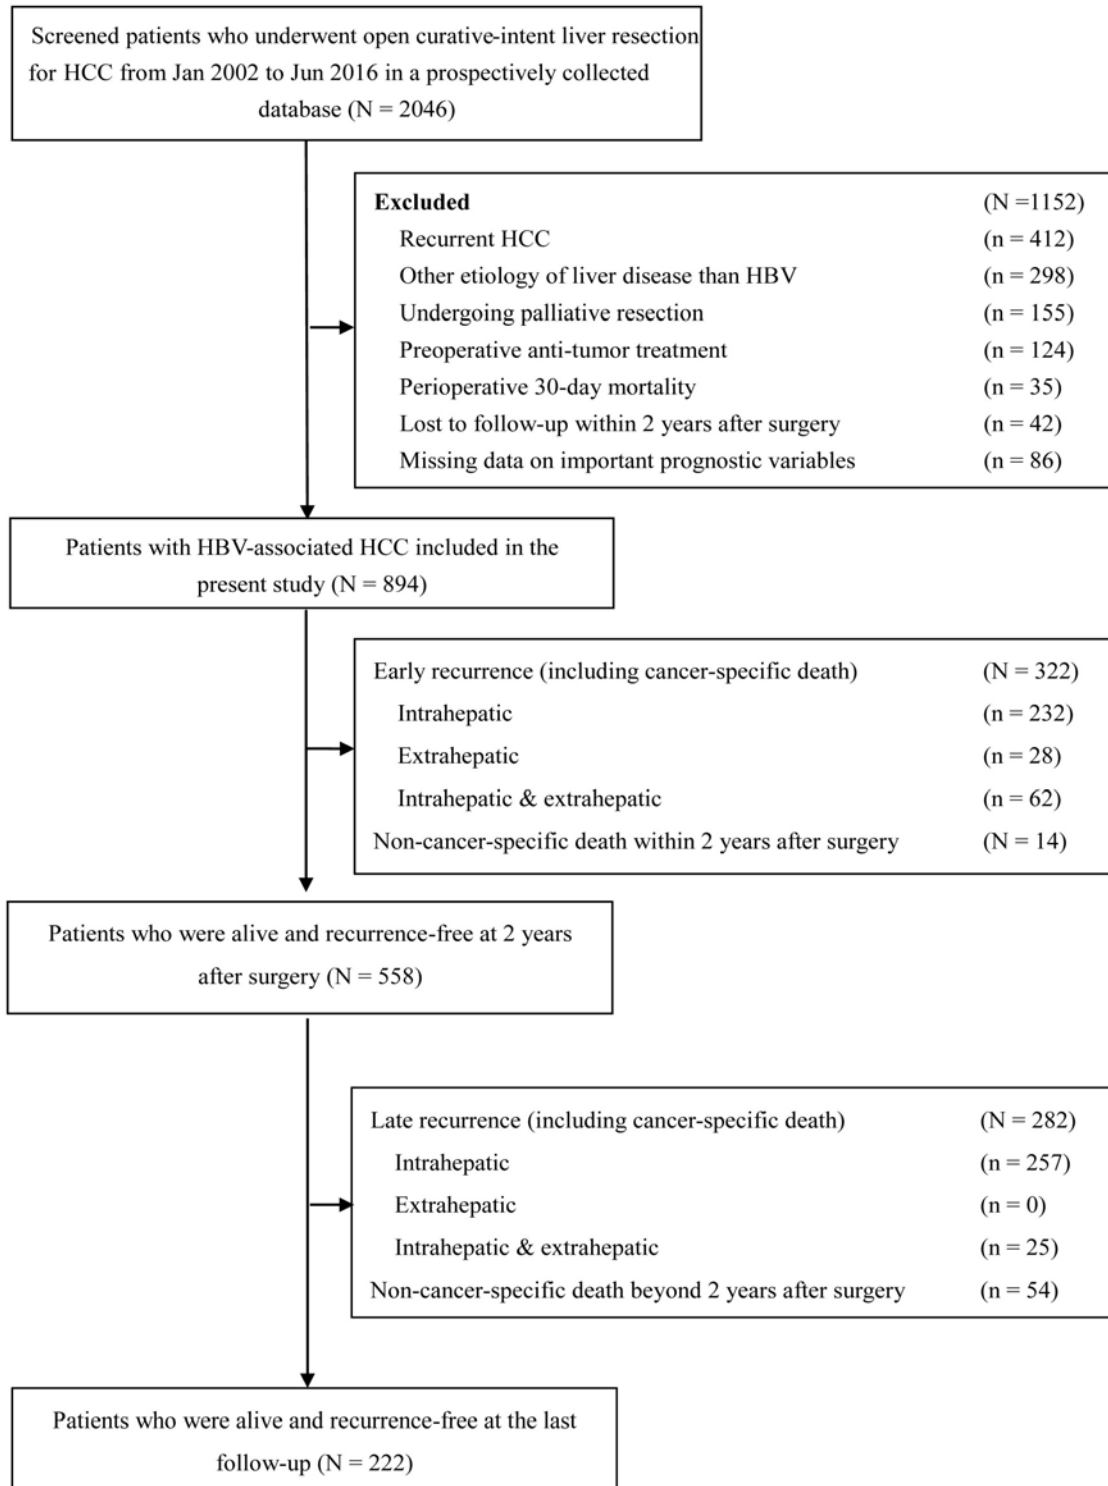

Figure S1. Flowchart of study population. HBV, hepatitis B virus; HCC, hepatocellular carcinoma.
